# Supplementary material for: Interactions between Jumbo Phage SA1 and Staphylococcus: A Global Transcriptomic Analysis
Source: MDPI journal article supplement (doi:10.3390/microorganisms10081590), 2022-08-07
Supplement: s1 [file s1]

# Supplementary material

## Interactions between Jumbo Phage SA1 and *Staphylococcus*: A Global Transcriptomic Analysis

---

Bingyan Zhang<sup>1,2</sup>, Jiayi Xu<sup>2</sup>, Xiaoqi He<sup>2</sup>, Yigang Tong<sup>2\*</sup>, Huiying Ren<sup>1\*</sup>

<sup>1</sup> College of Veterinary Medicine, Qingdao Agricultural University, Qingdao 266109, China

<sup>2</sup> College of Life Science and Technology, Beijing University of Chemical Technology, Beijing 100029, China

\* Correspondence: renren0228@sina.com (H. R.); tong.yigang@gmail.com (Y. T.); Tel: +86-10-64451781 (Y. T.); +86-532-58957734 (H. R.)

Table S1. Primers used for RT-qPCR validation

| Gene name     | Forward primer          | Reverse primer            | Product length |
|---------------|-------------------------|---------------------------|----------------|
| H3V22_RS06460 | TACTGCAACAGGGACAATAGC   | ATAGCCGTCCCTAGTACCATAC    | 99             |
| H3V22_RS06465 | TGCAGGGAATCAACCTACAA    | CTGTTAATGGCTTGAACAAGGT    | 120            |
| H3V22_RS11415 | AGACGTCGTCAAGATACGAAAG  | GCAATTGTTTCAGCATGCTTTG    | 107            |
| Late gene     | TGGTTTCCAGTTTGCTTTCAG   | GTCCATAAATTGAGATATTGCAACG | 79             |
| Middle gene   | CAGGATGTTTCAGAAGCAGATAA | ACATTCTTCCTGACATTTGGA     | 132            |
| Early gene    | TGTGAATGCGGAAATTGCTAAA  | CCATAACGCTGGTGTCATCT      | 79             |

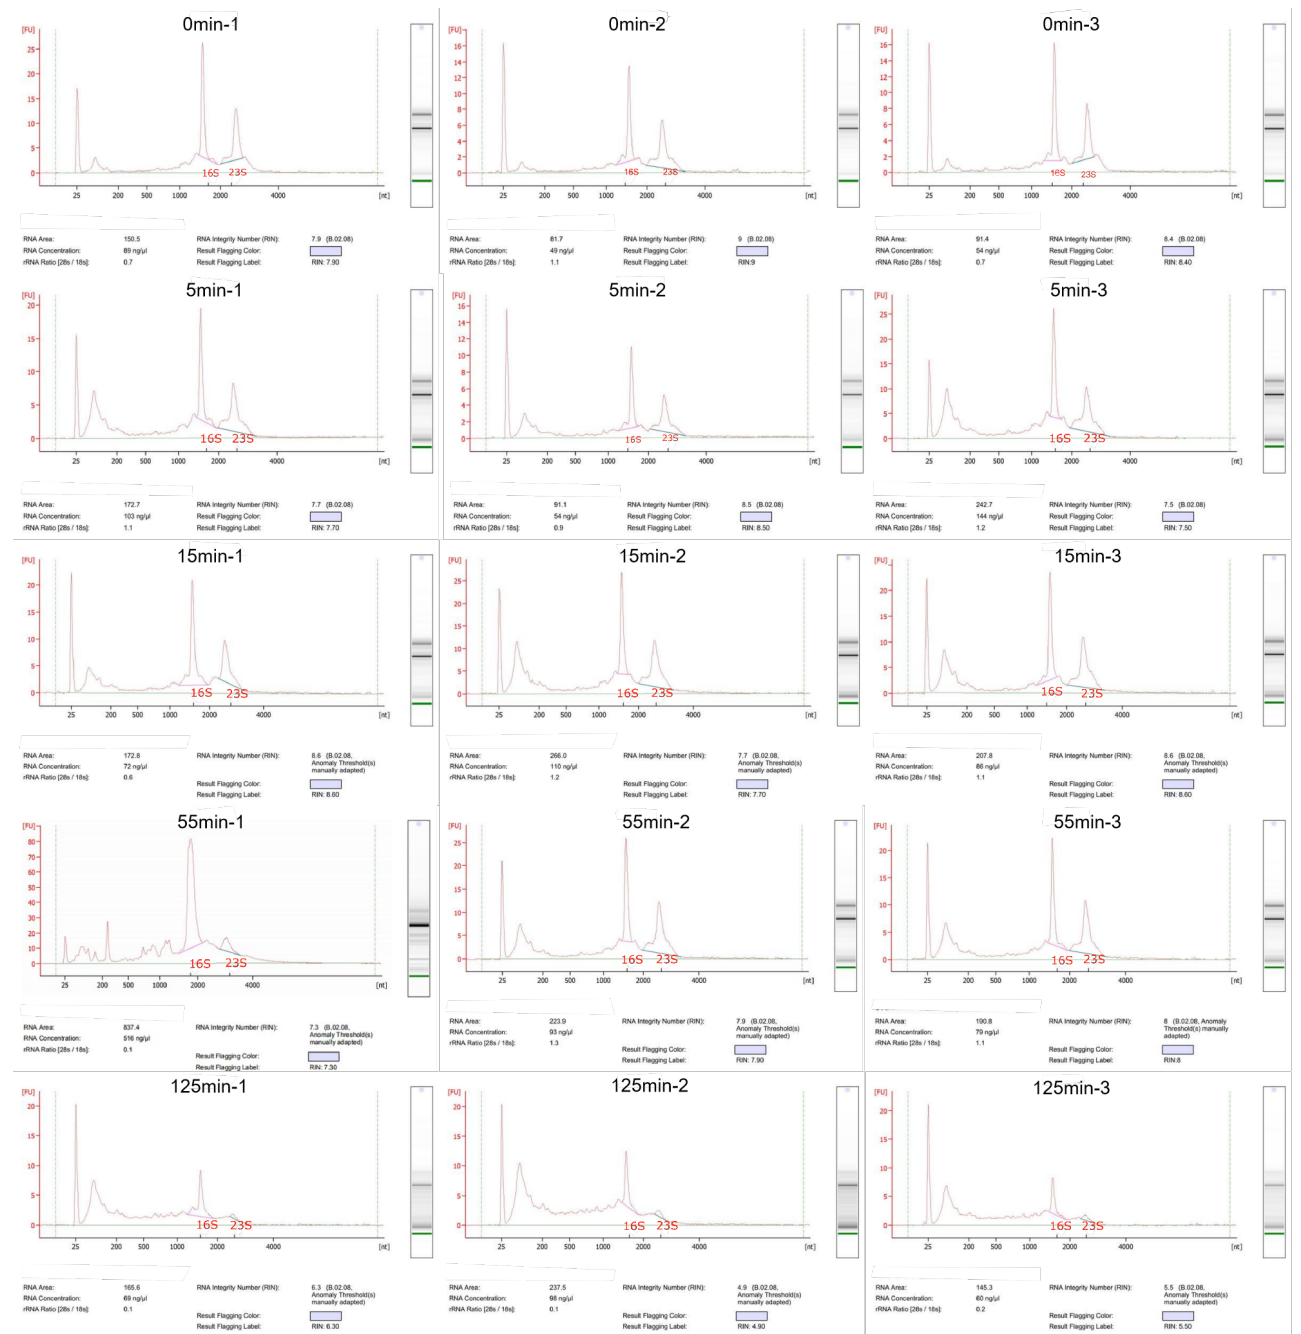

Figure S1. The Bioanalyzer electropherograms of total RNA were isolated from the bacteria at different time points post-infection. After phage SA1 infection, host RNA degraded over time, and the RIN(RNA integrity value) of the sample 125 min after infection was < 6.5.

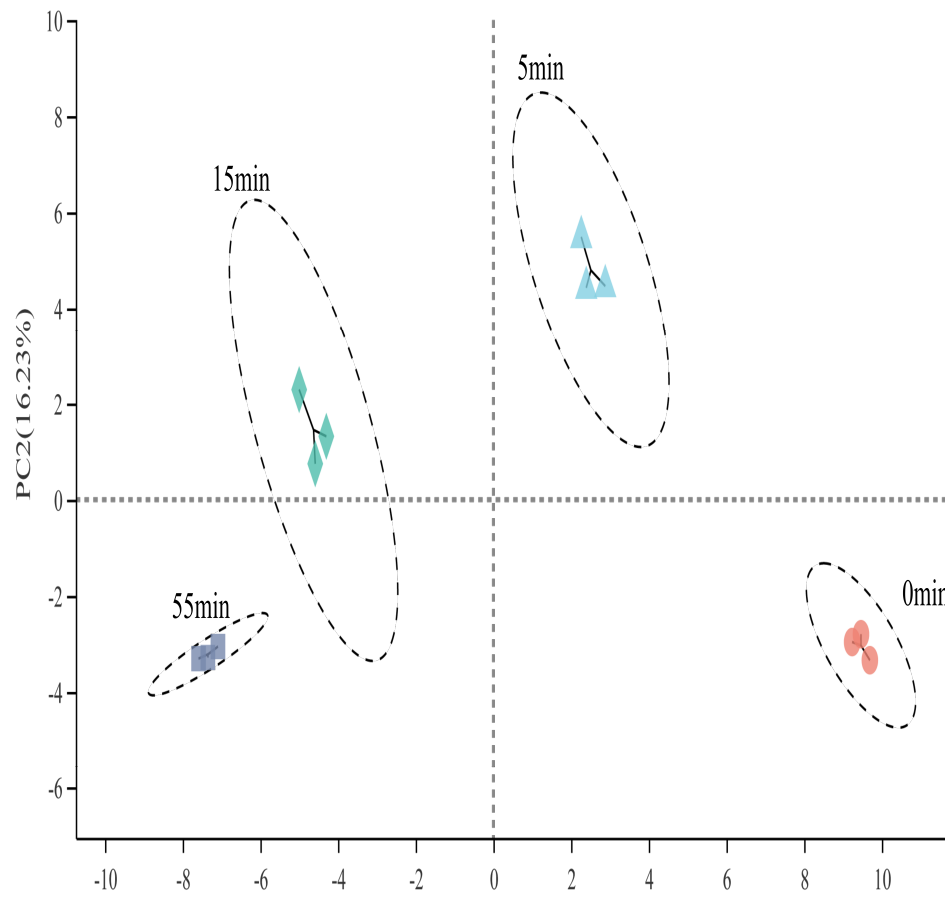

Figure S2. The principal component analysis (PCA) graph presents the correlation between all the samples used in this study. A greater distance between points suggests a more significant difference in host *S. lentus* gene expression.
